# Supplementary material for: More of the same or a change of scenery: an observational study of variety and frequency of physical activity in British children
Source: PubMed Central journal article supplement (PMC3751669; doi:10.1186/1471-2458-13-761), 2013-08-16
Supplement: 1471-2458-13-761-S1.pdf [file 1471-2458-13-761-S1.pdf]

**Supplementary table 1.** Interactions between strata of population subgroups and Variety and Frequency in associations with objectively measured MVPA

|      |                                                                   | Frequency     |              |           | Variety       |              |           |
|------|-------------------------------------------------------------------|---------------|--------------|-----------|---------------|--------------|-----------|
|      |                                                                   | $\beta$ Coef. | 95% CI       | p - value | $\beta$ Coef. | 95% CI       | p - value |
| MVPA | <b>Sex</b> (boys = 0)                                             | 0.013         | -0.016 0.042 | 0.374     | -0.003        | -0.032 0.026 | 0.825     |
|      | <b>Activity status</b> (Not meeting government PA guidelines = 0) | 0.002         | -0.019 0.022 | 0.851     | 0.002         | -0.019 0.023 | 0.851     |
|      | <b>Parent/guardian education level</b> (GCSE or lower=0)          |               |              |           |               |              |           |
|      | A-level or lower vocational                                       | 0.006         | -0.021 0.033 | 0.656     | 0.018         | -0.012 0.049 | 0.230     |
|      | University degree or higher                                       | 0.025         | -0.016 0.066 | 0.236     | 0.016         | -0.022 0.055 | 0.402     |

Associations were tested using multilevel linear regression.

Variety and Frequency were transformed to z scores so effect sizes are directly comparable.

Moderate-to-vigorous intensity physical activity (MVPA) was log transformed for analyses

Models were adjusted for age, sex, parental education level and age-standardised BMI.

Beta Coefficient (B coef.) and 95% confidence intervals (95% CI) <0 indicates that the effect size of the comparison group is smaller than the effect size of reference group whereas B coef. and 95% CI >0 indicates that the effect size of the comparison group is large than the effect size of the reference group

P – value for significance of the effect size differing between the reference and comparison groups.

GCSE; General Certificate of Secondary Education
